# Supplementary material for: Modeling the viscoelastic relaxation dynamics of soft particles via molecular dynamics simulation-informed multi-dimensional transition-state theory
Source: Royal Society of Chemistry journal article supplement (doi:10.1039/d2sm00848c), 2022-12-07
Supplement: d2sm00848c1.pdf [file d2sm00848c1.pdf]

## Supplementary Materials For

### Modeling Viscoelastic Relaxation Dynamics of Soft Particles via Molecular Dynamics Simulation-Informed Multi-Dimensional Transition-State Theory

Shangchao Lin<sup>1,†</sup>, Lingling Zhao<sup>2,3,†,\*</sup>, Shuai Liu<sup>2</sup>, Yang Wang<sup>2</sup>, Ge Fu<sup>1</sup>

<sup>1</sup>Institute of Engineering Thermophysics, School of Mechanical Engineering, Shanghai Jiao Tong University, Shanghai, 200240, China

<sup>2</sup>Key Laboratory of Energy Thermal Conversion and Control of Ministry of Education, School of Energy & Environment, Southeast University, Nanjing, Jiangsu, 210096, China

<sup>3</sup>Shanghai Key Laboratory of Multiphase Flow and Heat Transfer in Power Engineering, University of Shanghai for Science and Technology, Shanghai, 200093, China

\*Corresponding author's contact information:

Lingling Zhao, phone: +86 13851680995; E-mail: [zhao\\_lingling@seu.edu.cn](mailto:zhao_lingling@seu.edu.cn)

<sup>†</sup>These authors contribute equally to this work.

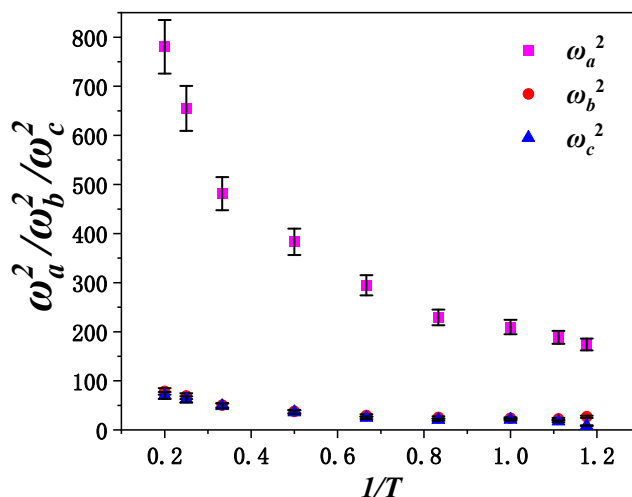

**Figure S1.** The squared angular frequencies  $\omega_a^2$ ,  $\omega_b^2$  and  $\omega_c^2$  for the single particle type system. The error bars reflect the standard deviations from averaging three replicated MD simulation runs.

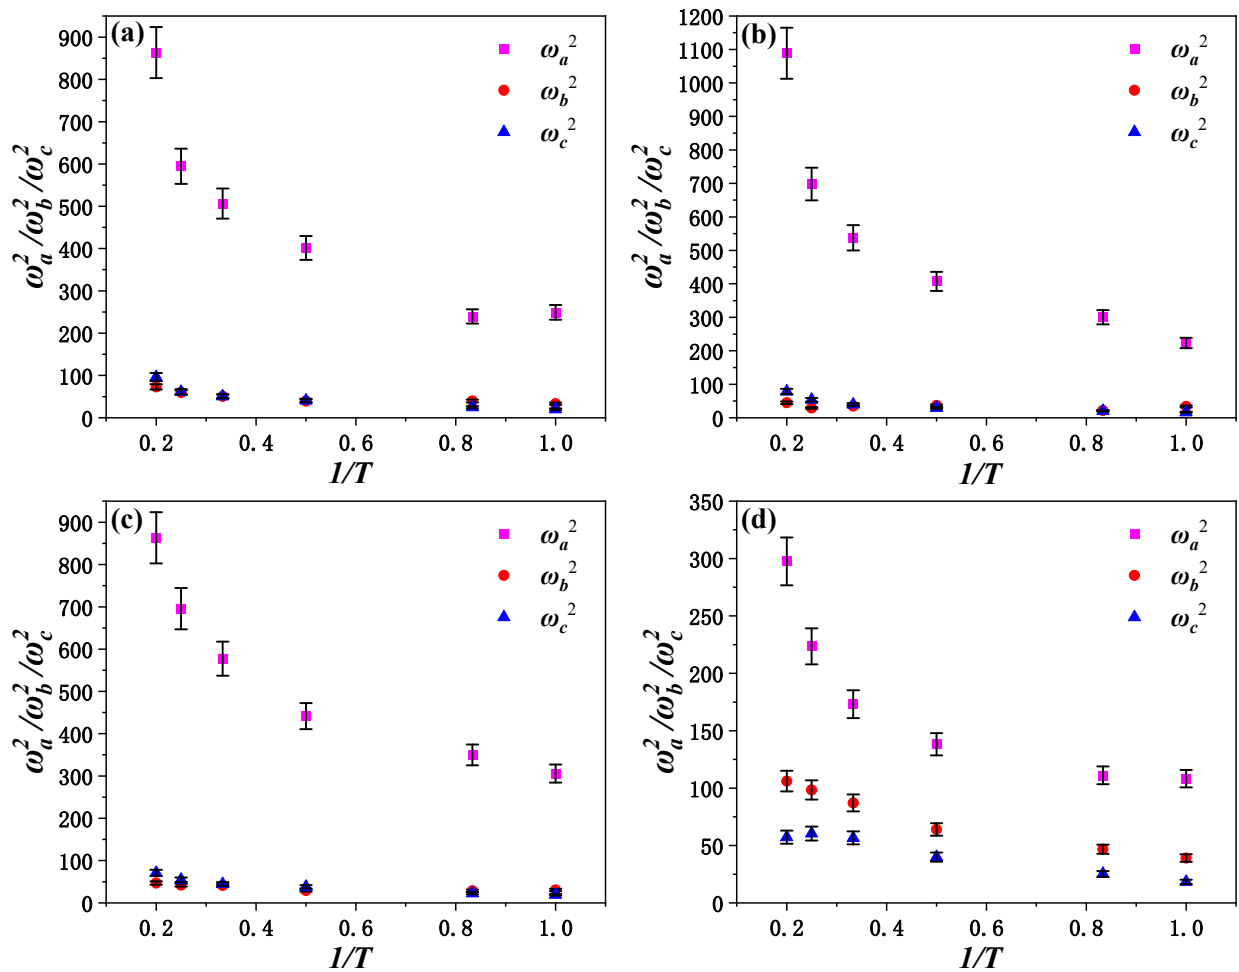

**Figure S2.** The squared angular frequencies  $\omega_a^2$ ,  $\omega_b^2$  and  $\omega_c^2$  for the binary mixture KA system between: (a) A-A pair, (b) B-B pair, (c) A-B pair, and (d) all-all pair. The error bars reflect the standard deviations from averaging three replicated MD simulation runs.

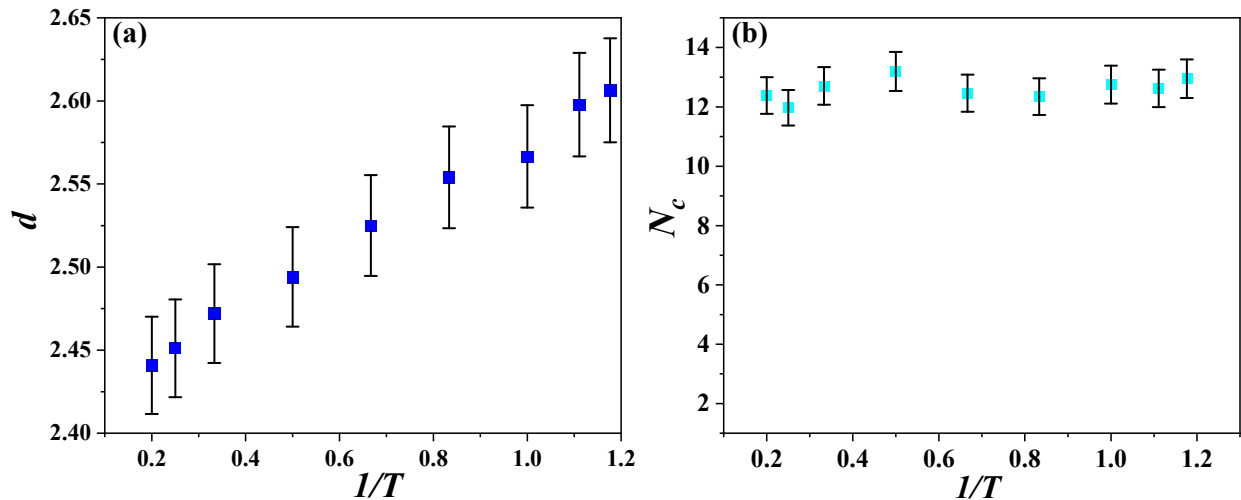

**Figure S3.** (a) The fractal dimension  $d$  and (b) coordination number  $N_c$  for the single particle type LJ system. The error bars reflect the standard deviations from averaging three replicated MD simulation runs.

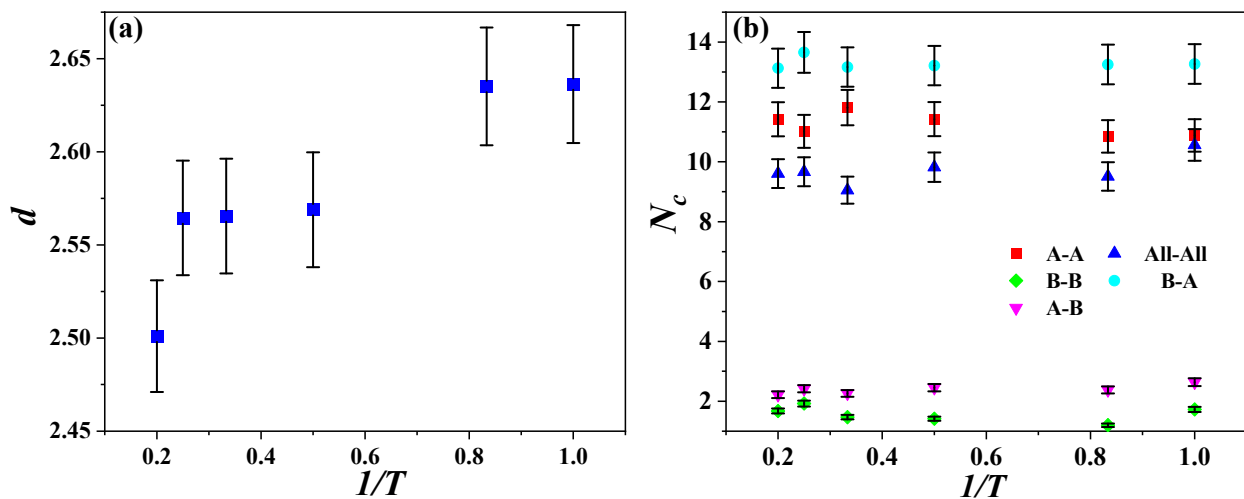

**Figure S4.** (a) The fractal dimension  $d$  and (b) coordination number  $N_c$  for the binary mixture KA system. The error bars reflect the standard deviations from averaging three replicated MD simulation runs.
